# Supplementary material for: Mosquito Cell-Derived Japanese Encephalitis Virus-Like Particles Induce Specific Humoral and Cellular Immune Responses in Mice
Source: PubMed Central journal article supplement (PMC7150764; doi:10.3390/v12030336), 2020-03-19
Supplement: viruses-12-00336-s001.pdf [file viruses-12-00336-s001.pdf]

Supplementary data

Figure S1. The sequence of the synthetic hr1pag1-JEV prME DNA fragment. This fragment contains the promoter region hr1 and pag1 (shown in light blue and blue, respectively), the coding region (an insect codon-optimized JEV prME gene shown in green from 105-794<sup>th</sup> amino acid of AAB66485) and a poly(A) site (shown in brown). Junction regions shown in black. The underline regions on both ends show restriction sites of *NheI* and *NotI*.

gctagcgtgttttacaagtagaattctaccgtaaagcgagtttagtttgaaaaacaaatgacatcattgtataatgacat  
catcccctgattgtgttttacaagtagaattctatccgtaaagcgagttcagtttgaaaaacaaatgagtcatacctaaacac  
gttaataatcttctgatatacagcttatgactcaagttatgagccgtgtgcaaaacatgagataagttatgacatcatccact  
gatcgtgcttacaagtagaattctactcgtaaagccagttcggttatgagccgtgtgcaaaacatgacatcagcttatgac  
tcatacttgattgtgttttaccgtagaattctactcgtaaagcgagttcggttatgagccgtgtgcaaaacatgacatcagc  
ttatgagtcataattaatcgtgcttacaagtagaattctactcgtaatactcatcgaccaatggcgctgctcggttcttatcg  
caacagagtggggccatccgcaactataaaaagccgagactggtagcaaacaccatcagctgattcagctcgtgttcat  
accgagatctccaccatgggtggcaacgagggttcatcatgtggctggcttccctggctgtggtcatcgttgcgccgggtg  
ctatgaagctgtctaactccagggcaagctgctgatgactatcaacaacaccgacatcgtgacgtgatcgtcatccctac  
ttcaaggagaaaaacaggtgctgggtgctgctatcgacgtcggttactgtgtaggagactatcacctacgaatgcc  
caaagctgacatgggcaacgacctgaggactggactgctggtgcgacaaccaggaagtgtacgtccagtagcggaa  
gggtgactaggaccagacactccaagagaactcgccgtcagtgctcctcagaccacggatgaatccagcctggtaac  
aagaaggaagcttggctggacagcactaaggccaccgctacctgatgaagaccgagaactggatcatccgtaaccctg  
gatacgttctcctggctgctgctgggatggatgctgggttctaacaacggccagcgcgtggcttctactatcctgctgct  
gctggctgccccgcttactcattcaactgcctgggtatgggcaaccgtgacttcatcaggggtgcttccggtgctactgg  
gtggacctgctcctggaaggcagactgctgactatcatggtaacgacaagccaaccctggactgctgcatgatcaa  
catcagggcttctcagctggccgaagtccgttactgctaccacgttctgtgactgacatctcaaccctgcccaggtgc  
cctaccactggagaggctcacaacgaaaagagaccgactctcactggtgcaagcaggggttaccgacaggggat  
ggggtaacggctgaggactgttcggcaaggcagcatcgacacttgcgtaagtctcttgcacctcaaaggccatcggta  
gaactatccagcccagaaacatcaagtagaagtggtatcttctgccaacggcaccactacctccgagaaccacggaaac  
tactctgctcaagtgggtgcctcacaggctccaagttcactgtcaccccaaacgctccttccatcactctgaagctgggag  
actacggagaggtgacctggactgcaaccaaggagcggcctgaacaccgagccttctacgtgatgactgtcggag  
caagtcttctggtccacagagaatggttcacgacctggctctgacctgacttctccttcttactgcttggaggaaca  
gggagctgctgatggaattcaggaagcccacgctaccaagcagctcgtggtcgctctgggttctcaagagggaggtctc  
caccagccctggctggagctatcgtggtcgaatacttctcatccgtgaagctgacttctggccacctgaagtgcaggctg  
aagatggacaagctggccctgaagggaactactacggaatgtgcaccgagaagttctcattcgtctaagaaccccgcg  
acactggacacggtaaccgtggtcatcgaactgtcactcggcagcagcggacctgcaagatccccatcgtgtccgtcg  
cttccctgaacgacatgacccccgtgggacgctggtgactgtcaaccattcgtcgtaccagctcagccaactctaagg  
tgctggtcgagatggaacctccttgggtgactcatacatcgtgatcgccgagacaagcagatcaaccaccactgg  
cacaaggctggctccactctgggaaaggcctttagcactaccctgaagggtgctcaacgtctggtgctctgggagcac

tgcttgggacttcggatctatcggcggagtgttcaactcaatcggcaaggctgtgcaccaggcttcggtggcgccttccgt  
actctgttcggaggtatgtcctggatcaccagggctgatgggcgctctgctgctgtggatgggtgtgaacgccagggac  
agaagcatcgctctggccttctggctactggcggagtgtgttcttctggctaccaacgtccacgcctaactgcagagta  
gatgccgaccgaacaagagctgatttcgagaacgcctcagccagcaactcgcgcgagcctagcaagttgtttattgcagct  
tataatggttacaataaagcaatagcatcacaatttcacaataaagcattttttcactgcattctagttgtggttcc  
aaactcatcaatgtatcttatcatgtctggatcggggcggccgc
